# Supplementary material for: Germline rare deleterious variant load alters cancer risk, age of onset and tumor characteristics
Source: PubMed Central journal article supplement (PMC9883433; doi:10.1038/s41698-023-00354-3), 2023-01-27
Supplement: 41698_2023_354_MOESM1_ESM.pdf [file 41698_2023_354_MOESM1_ESM.pdf]

**Germline rare deleterious variant load alters cancer risk, age of onset and tumor characteristics**

Myvizhi Esai Selvan<sup>1,2,4</sup>, Kenan Onel<sup>1</sup>, Sacha Gnjatic<sup>3,4</sup>, Robert J. Klein<sup>1</sup> and Zeynep H. Gümüş<sup>1,2,4\*</sup>

<sup>1</sup>Department of Genetics and Genomic Sciences, Icahn School of Medicine at Mount Sinai, New York, NY, 10029, USA

<sup>2</sup>Center for Thoracic Oncology, Tisch Cancer Institute, Icahn School of Medicine at Mount Sinai, New York, NY, 10029, USA

<sup>3</sup>Oncological Sciences, Tisch Cancer Institute, Icahn School of Medicine at Mount Sinai, New York, NY, 10029, USA

<sup>4</sup>Precision Immunology Institute, Icahn School of Medicine at Mount Sinai, New York, NY, 10029, USA

## List of Supplementary Figures

**Supplementary Figure 1.** Comparison of the variants identified in 6,275 TCGA cases from our case-control analysis and previous case-only analysis

**Supplementary Figure 2.** Gene-set level rare, deleterious variant (RDV) burden in the study cohorts with and without BRCA1/2 RDVs a) Discovery cohort b) Validation cohort

**Supplementary Figure 3.** Effect of gender on gene-set level burden of rare, deleterious variant burden in the study cohorts

**Supplementary Figure 4.** Comparison of immune cell fractions (from CIBERSORT) based on germline RDV load in TCGA cases for different gene-sets

**Supplementary Figure 5.** Gating of individuals of European ancestry in the BioMe cohort

**Supplementary Figure 6.** Tally of genes with per-sample rare synonymous variants between cases and controls

## List of Supplementary Tables

**Supplementary Table 1.** Distribution of samples in TCGA (<https://www.cancer.gov/tcga>)

**Supplementary Table 2.** dbGaP (<http://www.ncbi.nlm.nih.gov/gap>) control cohort

**Supplementary Table 3.** List of variants identified during germline variant calling in a case-control setting in the discovery cohort after sample and variant QC (6,371 cases and 6,647 controls)

**Supplementary Table 4.** Count of variants identified in prior case-only approach, our case-control approach and TOPMed

**Supplementary Table 5.** Comparison of the genotypes identified in prior case-only approach, our case-control approach and TOPMed

**Supplementary Table 6.** List of genes used in gene-set level burden analyses

**Supplementary Table 7.** Gene-set level rare, deleterious variant (RDV) burden in the study cohorts without BRCA1/2 RDVs

**Supplementary Table 8.** Distribution of males and females in the study cohorts

**Supplementary Table 9.** Gene-set level rare, deleterious variant (RDV) burden in the study cohorts based on the number of genes with RDVs

**Supplementary Table 10.** Effect of M1 Macrophages on survival in TCGA cases

## List of Supplementary Data

**Supplementary Data 1.** List of genes with significant burden in multi-cancer and tissue-specific gene level burden analysis. Data in Supp\_Data\_1\_genelevel.xlsx

**Supplementary Data 2.** The gene-set level burden (odds ratio (OR) and  $p$ -value) of rare, deleterious variant in Fanconi Anemia gene-set for multi-cancer and tissue-specific cancer. Data in Supp\_Data\_2\_FAgenesetlevel.xlsx

**Supplementary Data 3.** The gene-set level burden (odds ratio (OR) and  $p$ -value) of rare, deleterious variant in CPD, DDR, SCD and FA gene-sets for pan-gastrointestinal, pan-kidney, pan-gynecological, and pan-squamous cancer types. Data in Supp\_Data\_3\_Pan\_geneset.xlsx

**Supplementary Data 4.** The gene-set level burden (odds ratio (OR) and  $p$ -value) of rare, deleterious variant for all gene-sets listed in Molecular Signatures Database (MSigDB) for multi-cancer. Data in Supp\_Data\_4\_MSigDB.xlsx

**Supplementary Data 5.** Comparison of immune cell fractions (from CIBERSORT) based on germline RDV load in TCGA cases for different gene-sets. Data in Supp\_Data\_5\_TME.xlsx

**Supplementary Data 6.** Comparison of gene expression of genes related to M1 Macrophages (LM22 matrix) based on germline RDV load in TCGA cases for different gene-sets. Data in Supp\_Data\_6\_M1Macrophages\_Genes.xlsx

**Supplementary Data 7.** Comparison of tumor mutational burden (TMB) based on germline RDV load in TCGA cases for different gene-sets. Data in Supp\_Data\_7\_TMB.xlsx

**Supplementary Data 8.** List of ICD9/10 codes for identifying cancer patients. Data in Supp\_Data\_8\_ICD9\_10.xlsx

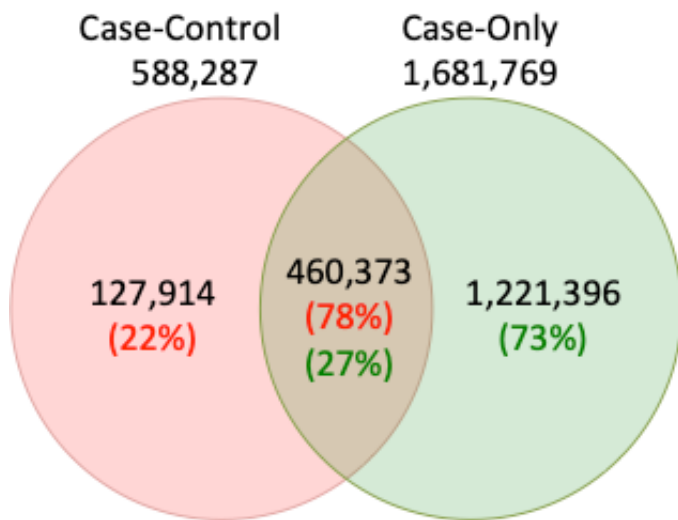

**Supplementary Figure 1. Comparison of the variants identified in 6,275 TCGA cases from our case-control analysis and previous case-only analysis.**

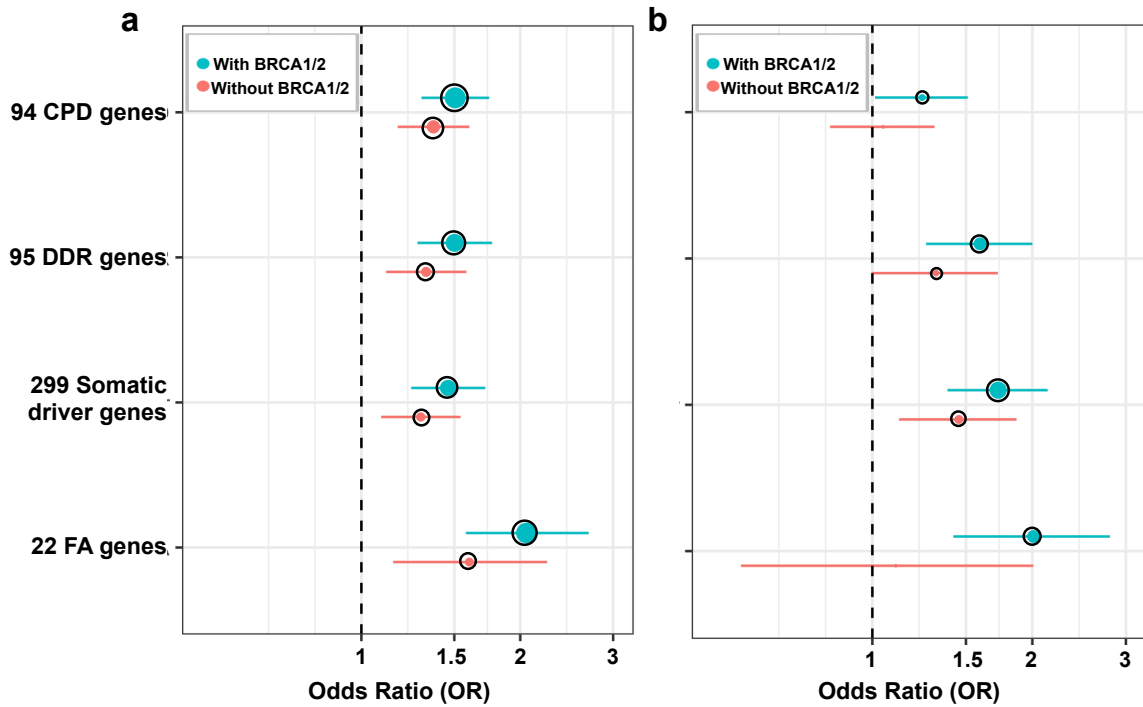

**Supplementary Figure 2. Gene-set level rare, deleterious variant (RDV) burden in the study cohorts with and without BRCA1/2 RDVs.** Gene-set level burden of rare, deleterious variants when using penalized logistic regression analysis (PLRA) (i) with BRCA1/2 RDVs (blue) and (ii) without BRCA1/2 RDVs (red). **a)** Discovery cohort; **b)** Validation cohort. The whiskers span the 95% confidence interval for OR values. The black circle outline indicates significant burden  $p \leq 0.05$

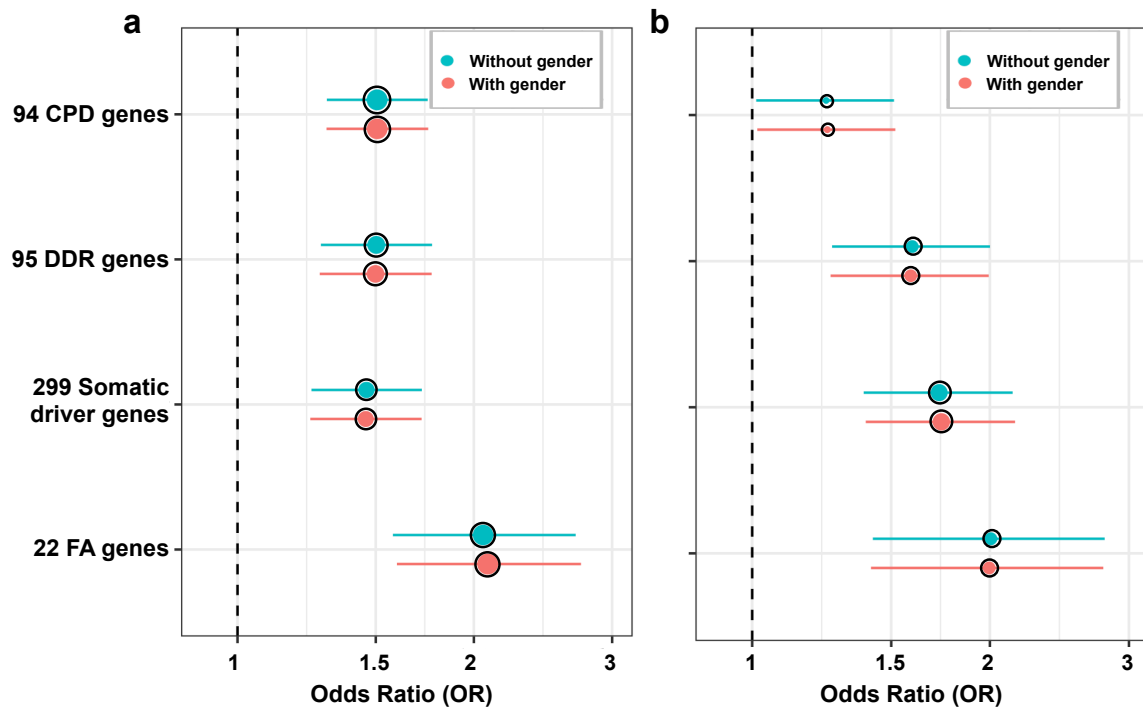

**Supplementary Figure 3. Effect of gender on gene-set level burden of rare, deleterious variant in the study cohorts.** Gene-set level burden of rare, deleterious variants when using penalized logistic regression analysis (PLRA) (i) without gender effect, by not using gender information as a covariate (blue) and (ii) with gender effect, by using the gender information as additional covariate (red). **a**) Discovery cohort; **b**) Validation cohort. The whiskers span the 95% confidence interval for OR values. The black circle outline indicates significant burden  $p \leq 0.05$

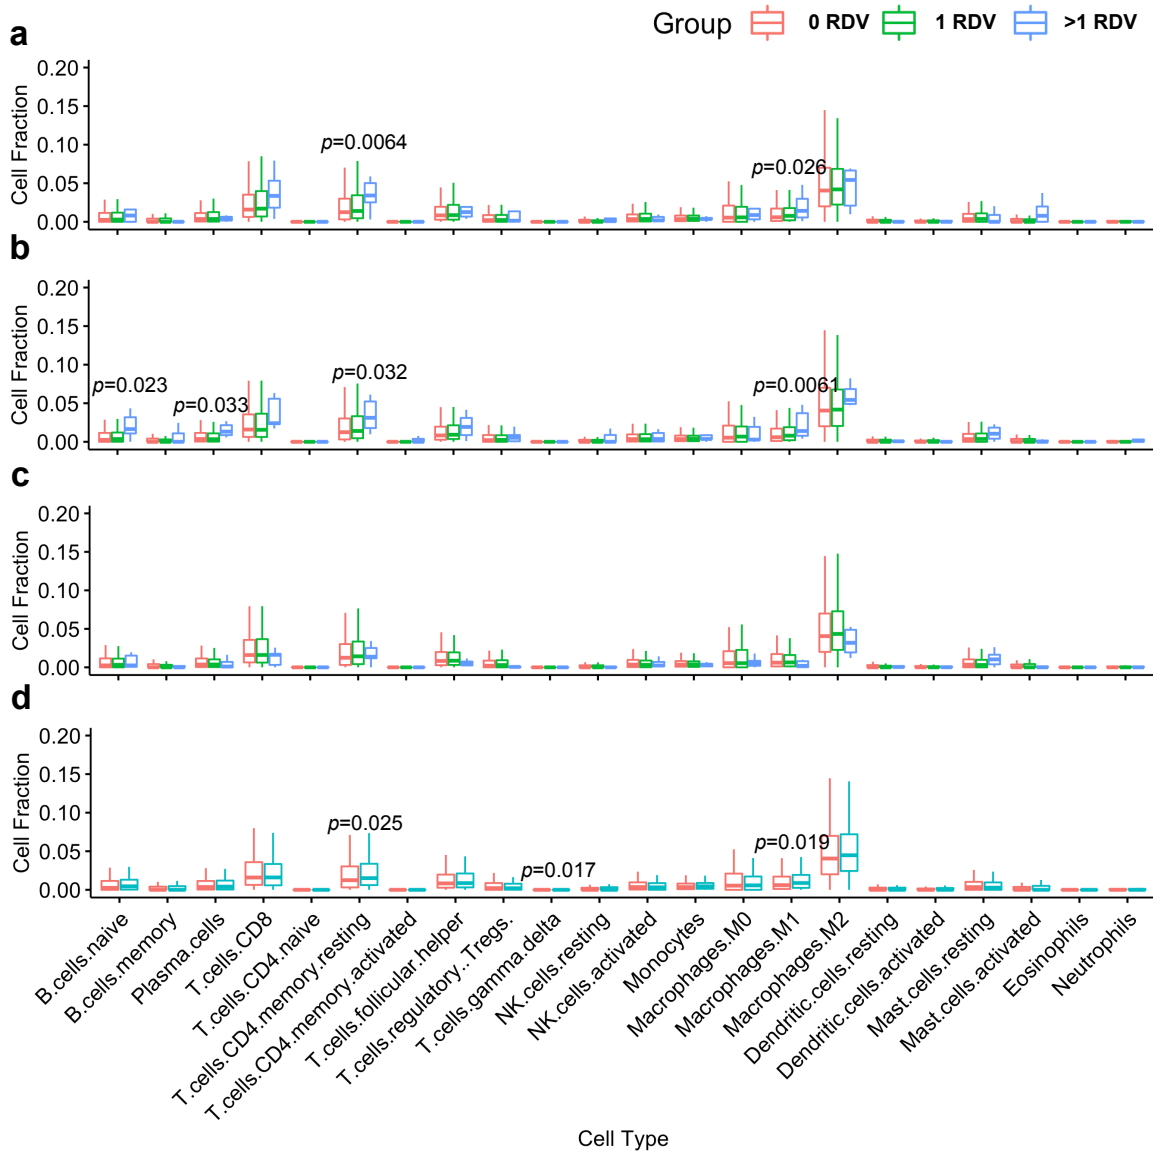

**Supplementary Figure 4. Comparison of immune cell fractions (from CIBERSORT) based on germline RDV load in TCGA cases for different gene-sets. a) 94 Cancer predisposition genes b) 95 DNA damage repair genes c) 299 Somatic cancer driver genes d) 22 Fanconi Anemia genes.** Significant  $p$  values from Kruskal-Wallis test are included in the figure. Boxplot elements: center line indicates median; box limits represent lower (25<sup>th</sup> percentile) and upper (75<sup>th</sup> percentile) quartiles; whiskers extend to 1.5 times the interquartile range.

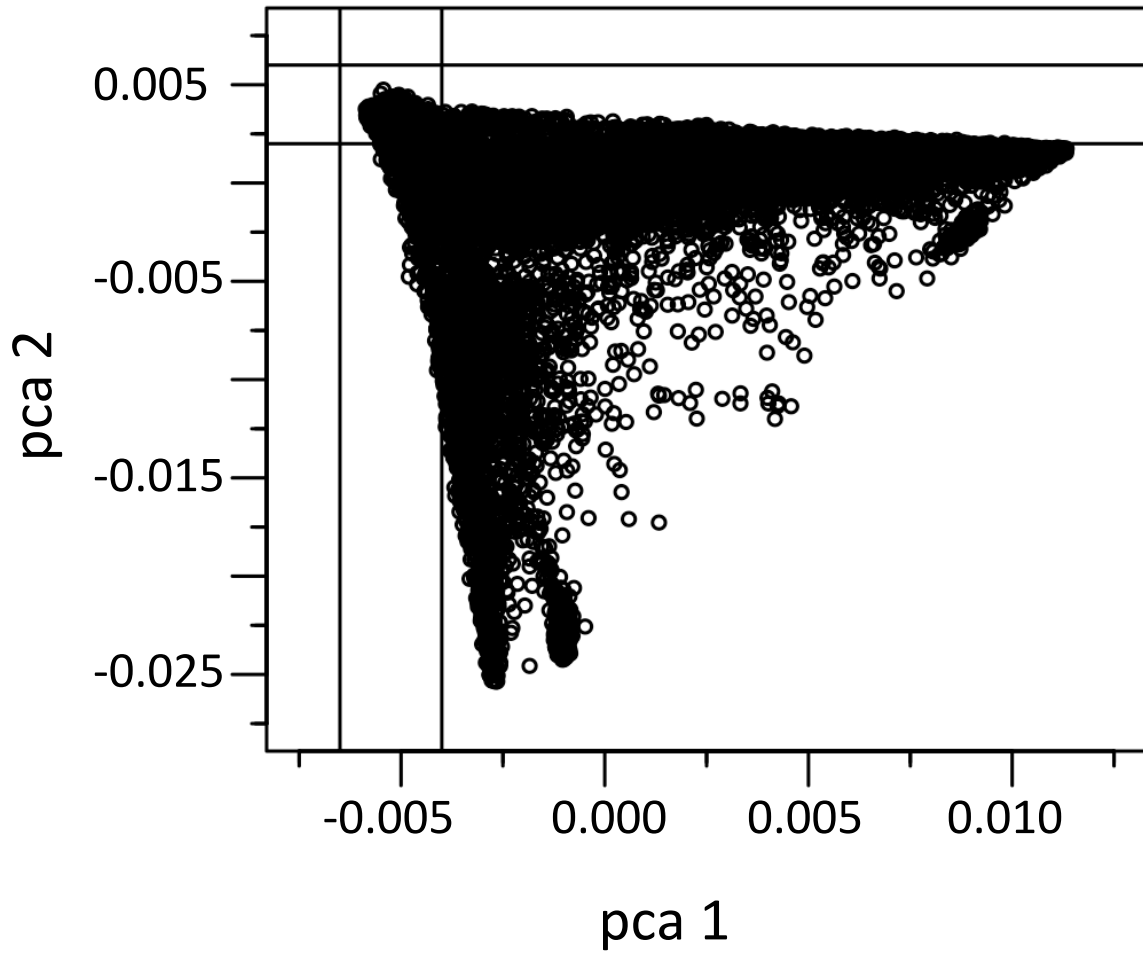

**Supplementary Figure 5. Gating individuals of European ancestry in the BioMe cohort.** 10,784 individuals of European ancestry were gated using the top two principal components.



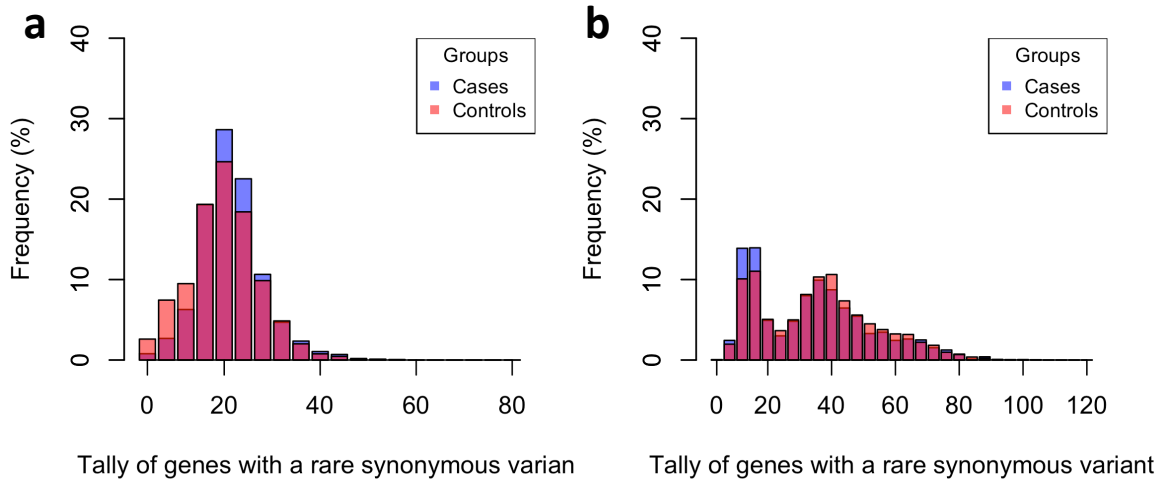

**Supplementary Figure 6. Tally of genes with per-sample rare synonymous variants between cases and controls. a)** Discovery cohort, Cases: average  $19.98 \pm 6.7$  genes, Controls: average  $18.38 \pm 7.3$  genes, Mann-Whitney U test  $p$ -value  $< 2.2e-16$ . **b)** Validation cohort, Cases: average  $32.36 \pm 18.35$  genes, Controls: average  $34.60 \pm 17.87$  genes, Mann-Whitney U test  $p$ -value =  $2.75e-07$ .

**Supplementary Table 1. Distribution of samples in TCGA**  
(<https://www.cancer.gov/tcga>)

| Sl.No | Cancer Type                                     | # Cases before QC | # Cases after QC |
|-------|-------------------------------------------------|-------------------|------------------|
| 1     | Breast invasive carcinoma                       | 848               | 622              |
| 2     | Lung adenocarcinoma                             | 546               | 463              |
| 3     | Lung squamous cell carcinoma                    | 494               | 443              |
| 4     | Brain Lower Grade Glioma                        | 508               | 426              |
| 5     | Head and Neck squamous cell carcinoma           | 526               | 426              |
| 6     | Skin Cutaneous Melanoma                         | 453               | 424              |
| 7     | Prostate adenocarcinoma                         | 491               | 403              |
| 8     | Thyroid carcinoma                               | 487               | 338              |
| 9     | Uterine Corpus Endometrial Carcinoma            | 480               | 331              |
| 10    | Bladder Urothelial Carcinoma                    | 400               | 305              |
| 11    | Kidney renal clear cell carcinoma               | 367               | 279              |
| 12    | Stomach adenocarcinoma                          | 415               | 268              |
| 13    | Colon adenocarcinoma                            | 350               | 267              |
| 14    | Glioblastoma multiforme                         | 310               | 252              |
| 15    | Ovarian serous cystadenocarcinoma               | 277               | 235              |
| 16    | Kidney renal papillary cell carcinoma           | 280               | 193              |
| 17    | Liver hepatocellular carcinoma                  | 363               | 167              |
| 18    | Cervical SqCC and endocervical adenocarcinoma   | 283               | 162              |
| 19    | Rectum adenocarcinoma                           | 107               | 99               |
| 20    | Adrenocortical carcinoma                        | 90                | 76               |
| 21    | Acute Myeloid Leukemia                          | 75                | 67               |
| 22    | Kidney Chromophobe                              | 66                | 56               |
| 23    | Uterine Carcinosarcoma                          | 57                | 42               |
| 24    | Lymphoid Neoplasm Diffuse Large B-cell Lymphoma | 48                | 27               |
|       | <b>Total</b>                                    | 8321              | 6371             |

**Supplementary Table 2. dbGaP control cohort.** Total number of samples in each dbGaP (<http://www.ncbi.nlm.nih.gov/gap>) study before and after sample QC.

| <b>dbGaP Study Accession</b> | <b>Study Name</b>                                                                            | <b>Start Count</b> | <b>Final Count</b> |
|------------------------------|----------------------------------------------------------------------------------------------|--------------------|--------------------|
| phs000209                    | Multi-Ethnic Study of Atherosclerosis (MESA) Cohort                                          | 401                | 242                |
| phs000276                    | STAMPEED: Northern Finland Birth Cohort 1966 (NFBC1966)                                      | 514                | 513                |
| phs000296                    | NHLBI GO-ESP: Lung Cohorts Exome Sequencing Project (COPDGene)                               | 290                | 280                |
| phs000298                    | ARRA Autism Sequencing Collaboration                                                         | 168                | 168                |
| phs000424                    | Common Fund (CF) Genotype-Tissue Expression Project (GTEx)                                   | 478                | 380                |
| phs000654                    | Genetic Analyses in Epileptic Encephalopathies                                               | 583                | 457                |
| phs000687                    | Bulgarian Trio Sequencing Study to Identify de Novo Mutations in Schizophrenia               | 555                | 524                |
| phs000806                    | Myocardial Infarction Genetics Exome Sequencing Consortium: Ottawa Heart Study               | 964                | 942                |
| phs000876                    | Transdisciplinary Research Into Cancer of the Lung (TRICL) - Exome Plus Targeted Sequencing  | 591                | 551                |
| phs000971                    | The ClinSeq Project: Piloting large-scale genome sequencing for research in genomic medicine | 621                | 519                |
| phs001000                    | Myocardial Infarction Genetics Exome Sequencing Consortium: U. of Leicester                  | 1153               | 1022               |
| phs001101                    | Myocardial Infarction Genetics Exome Sequencing Consortium: Malmo Diet and Cancer Study      | 1070               | 1049               |
| <b>Total</b>                 |                                                                                              | <b>7388</b>        | <b>6647</b>        |

**Supplementary Table 3. List of variants identified during germline variant calling in a case-control setting in the discovery cohort after sample and variant QC (6,371 cases and 6,647 controls)**

|   | <b>Variant Type</b>    | <b>Number of sites</b> |
|---|------------------------|------------------------|
| 1 | Exonic                 | 935,912                |
| 2 | Exonic; splicing       | 245                    |
| 3 | ncRNA_exonic; splicing | 18                     |
| 4 | ncRNA_splicing         | 21                     |
| 5 | Splicing               | 5,413                  |
|   |                        | 941,609                |

**Supplementary Table 4. Count of variants identified in prior case-only approach, our case-control approach and TOPMed**

| Case-Only Approach | Case-Control Approach | TOPMed | Count   |
|--------------------|-----------------------|--------|---------|
| FALSE              | TRUE                  | TRUE   | 63,364  |
| TRUE               | FALSE                 | TRUE   | 713,548 |
| TRUE               | TRUE                  | TRUE   | 311,040 |
| TRUE               | FALSE                 | FALSE  | 507,848 |
| TRUE               | TRUE                  | FALSE  | 149,333 |
| FALSE              | TRUE                  | FALSE  | 64,550  |

**Supplementary Table 5. Comparison of the genotypes identified in prior case-only approach, our case-control approach and TOPMed**

| Set called in              | SNV   | Alt allele in TOPMed | Case-Control Approach |             |             | Case-only Approach |             |                |
|----------------------------|-------|----------------------|-----------------------|-------------|-------------|--------------------|-------------|----------------|
|                            |       |                      | Wild-Type             | Alt Allele  | No call     | Wild-Type          | Alt Allele  | No call        |
| Both                       | TRUE  | No                   | 19,166,147,487        | 209,163,900 | 244,513,121 |                    | 224,400,086 | 19,391,960,513 |
|                            | TRUE  | Yes                  | 217,748,300           | 334,604,986 | 8,947,966   |                    | 338,260,924 | 222,926,977    |
|                            | FALSE | No                   | 469,645,253           | 1,839,433   | 6,241,998   | 2                  | 2,004,526   | 475,635,491    |
|                            | FALSE | Yes                  | 1,922,291             | 1,734,420   | 114,221     | 1                  | 1,787,149   | 1,983,083      |
| Just case-control approach | TRUE  | No                   | 538,054,583           | 2,957,801   | 7,786,930   |                    |             |                |
|                            | TRUE  | Yes                  | 3,118,583             | 2,713,382   | 81,985      |                    |             |                |
|                            | FALSE | No                   | 12,324,896            | 83,372      | 237,873     |                    |             |                |
|                            | FALSE | Yes                  | 85,516                | 134,286     | 2,649       |                    |             |                |
| Just case-only approach    | TRUE  | No                   |                       |             |             |                    | 84,323,770  | 15,378,080,045 |
|                            | TRUE  | Yes                  |                       |             |             |                    | 135,329,018 | 413,489,119    |
|                            | FALSE | No                   |                       |             |             | 21                 | 3,194,128   | 860,681,403    |
|                            | FALSE | Yes                  |                       |             |             | 1                  | 4,388,505   | 29,973,286     |

**Supplementary Table 6. List of genes used in gene-set level burden analyses**

|                                                     | <b>Gene Symbol</b>                                                                                                                                                                                                                                                                                                                                                                                                                                                                                                                                                                                                                                                                                                                                                                                                                                                                                                                                                                                                                                                                                                                                                                                                                                                      |
|-----------------------------------------------------|-------------------------------------------------------------------------------------------------------------------------------------------------------------------------------------------------------------------------------------------------------------------------------------------------------------------------------------------------------------------------------------------------------------------------------------------------------------------------------------------------------------------------------------------------------------------------------------------------------------------------------------------------------------------------------------------------------------------------------------------------------------------------------------------------------------------------------------------------------------------------------------------------------------------------------------------------------------------------------------------------------------------------------------------------------------------------------------------------------------------------------------------------------------------------------------------------------------------------------------------------------------------------|
| <b>Gene-Set I:<br/>94 TruSight risk panel genes</b> | AIP, ALK, APC, ATM, BAP1, BLM, BMPR1A, BRCA1, BRCA2, BRIP1, BUB1B, CDC73, CDH1, CDK4, CDKN1C, CDKN2A, CEBPA, CEP57, CHEK2, CYLD, DDB2, DICER1, DIS3L2, EGFR, EPCAM, ERCC2, ERCC3, ERCC4, BIVM-ERCC5, EXT1, EXT2, EZH2, FANCA, FANCB, FANCC, FANCD2, FANCE, FANCF, FANCG, FANCI, FANCL, FANCM, FH, FLCN, GATA2, GPC3, HNF1A, HRAS, KIT, MAX, MEN1, MET, MLH1, MSH2, MSH6, MUTYH, NBN, NF1, NF2, NSD1, PALB2, PHOX2B, PMS1, PMS2, PRF1, PRKAR1A, PTCH1, PTEN, RAD51C, RAD51D, RB1, RECQL4, RET, RHBDF2, RUNX1, SBDS, SDHAF2, SDHB, SDHC, SDHD, SLX4, SMAD4, SMARCB1, STK11, SUFU, TMEM127, TP53, TSC1, TSC2, VHL, WRN, WT1, XPA, XPC                                                                                                                                                                                                                                                                                                                                                                                                                                                                                                                                                                                                                                      |
| <b>Gene-Set II:<br/>95 DNA repair genes</b>         | ALKBH2, ALKBH3, APEX1, APEX2, ATM, ATR, ATRIP, BAP1, BARD1, BIVM-ERCC5, BLM, BRCA1 (FANCS), BRCA2 (FANCD1), BRIP1 (FANCJ), CHEK1, CHEK2, CUL5, EME1, ERCC1, ERCC2, ERCC4 (FANCQ), ERCC6, EXO1, FAM175A, FANCA, FANCB, FANCC, FANCD2, FANCE, FANCF, FANCG, FANCI, FANCL, FANCM, FEN1, GEN1, LIG4, MAD2L2, MDC1, MGMT, MLH1, MLH3, MRE11A, MSH2, MSH3, MSH6, MUC81, NBN, NHEJ1, NUDT1, NUDT15, NUDT18, PALB2 (FANCN), PARP1, PMS1, PMS2, POLB, POLE, POLE3, POLL, POLM, POLN, POLQ, PRKDC, RAD50, RAD51 (FANCR), RAD51C (FANCO), RAD51D, RAD52, RBBP8, REV1, REV3L, RFWD3 (FANCW), RNMT, RRM1, RRM2, SHFM1, SHPRH, SLX1A, SLX4 (FANCP), TDG, TDP1, TOP3A, TOPBP1, TP53BP1, TREX1, UBE2T (FANCT), UNG, XPA, XPC, XRCC2 (FANCU), XRCC3, XRCC4, XRCC5, XRCC6                                                                                                                                                                                                                                                                                                                                                                                                                                                                                                                 |
| <b>Gene-Set III:<br/>299 cancer driver genes</b>    | ABL1, ACVR1, ACVR1B, ACVR2A, AJUBA, AKT1, ALB, ALK, AMER1, APC, APOB, AR, ARAF, ARHGAP35, ARID1A, ARID2, ARID5B, ASXL1, ASXL2, ATF7IP, ATM, ATR, ATRX, ATXN3, AXIN1, AXIN2, B2M, BAP1, BCL2, BCL2L11, BCOR, BRAF, BRCA1, BRCA2, BRD7, BTG2, CACNA1A, CARD11, CASP8, CBF3, CBWD3, CCND1, CD70, CD79B, CDH1, CDK12, CDK4, CDKN1A, CDKN1B, CDKN2A, CDKN2C, CEBPA, CHD3, CHD4, CHD8, CHEK2, CIC, CNBD1, COL5A1, CREB3L3, CREBBP, CSDE1, CTCF, CTNNA1, CTNND1, CUL1, CUL3, CYLD, CYSLTR2, DACH1, DAZAP1, DDX3X, DHX9, DIAPH2, DICER1, DMD, DNMT3A, EEF1A1, EEF2, EGFR, EGR3, EIF1AX, ELF3, EP300, EPAS1, EPHA2, EPHA3, ERBB2, ERBB3, ERBB4, ERCC2, ESR1, EZH2, FAM46D, FAT1, FBXW7, FGFR1, FGFR2, FGFR3, FLNA, FLT3, FOXA1, FOXA2, FOXQ1, FUBP1, GABRA6, GATA3, GNA11, GNA13, GNAQ, GNAS, GPS2, GRIN2D, GTF2I, H3F3A, H3F3C, HGF, HIST1H1C, HIST1H1E, HLA-A, HLA-B, HRAS, HUWE1, IDH1, IDH2, IL6ST, IL7R, INPPL1, IRF2, IRF6, JAK1, JAK2, JAK3, KANSL1, KDM5C, KDM6A, KEAP1, KEL, KIF1A, KIT, KLF5, KMT2A, KMT2B, KMT2C, KMT2D, KRAS, KRT222, LATS1, LATS2, LEMD2, LZTR1, MACF1, MAP2K1, MAP2K4, MAP3K1, MAP3K4, MAPK1, MAX, MECOM, MED12, MEN1, MET, MGA, MGMT, MLH1, MSH2, MSH3, MSH6, MTOR, MUC6, MYC, MYCN, MYD88, MYH9, NCOR1, NF1, NF2, NFE2L2, NIPBL, NOTCH1, NOTCH2, |

|                                                            |                                                                                                                                                                                                                                                                                                                                                                                                                                                                                                                                                                                                                                                                                                                                                                                                                                                                        |
|------------------------------------------------------------|------------------------------------------------------------------------------------------------------------------------------------------------------------------------------------------------------------------------------------------------------------------------------------------------------------------------------------------------------------------------------------------------------------------------------------------------------------------------------------------------------------------------------------------------------------------------------------------------------------------------------------------------------------------------------------------------------------------------------------------------------------------------------------------------------------------------------------------------------------------------|
|                                                            | <p><i>NPM1, NRAS, NSD1, NUP133, NUP93, PAX5, PBRM1, PCBP1, PDGFRA, PDS5B, PGR, PHF6, PIK3CA, PIK3CB, PIK3CG, PIK3R1, PIK3R2, PIM1, PLCB4, PLCG1, PLXNB2, PMS1, PMS2, POLE, POLQ, POLRMT, PPM1D, PPP2R1A, PPP6C, PRKAR1A, PSIP1, PTCH1, PTEN, PTMA, PTPDC1, PTPN11, PTPRC, PTPRD, RAC1, RAD21, RAF1, RARA, RASA1, RB1, RBM10,, RET, RFC1, RHEB, RHOA, RHOB, RIT1, RNF111, RNF43, RPL22, RPL5, RPS6KA3, RQCD1, RRAS2, RUNX1, RXRA, SCAF4, SETBP1, SETD2, SF1, SF3B1, SIN3A, SMAD2, SMAD4, SMARCA1, SMARCA4, SMARCB1, SMC1A, SMC3, SOS1, SOX17, SOX9, SPOP, SPTA1, SPTAN1, SRSF2, STAG2, STK11, TAF1, TBL1XR1, TBX3, TCEB1, TCF12, TCF7L2, TET2, TGFBR2, TGIF1, THRAP3, TLR4, TMSB4X, TNFAIP3, TP53, TRAF3, TSC1, TSC2, TXNIP, U2AF1, UNCX, USP9X, VHL, WHSC1, WT1, XPO1, ZBTB20, ZBTB7B, ZC3H12A, ZCCHC12, ZFHX3, ZFP36L1, ZFP36L2, ZMYM2, ZMYM3, ZNF133, ZNF750</i></p> |
| <p><b>Gene-Set IV:<br/>22 Fanconi Anemia<br/>genes</b></p> | <p><i>FANCA, FANCB, FANCC, FANCD1 (BRCA2), FANCD2, FANCE, FANCF, FANCG, FANCI, FANCJ (BRIP1), FANCL, FANCM, FANCN (PALB2), FANCO (RAD51C), FANCP (SLX4), FANCQ (ERCC4), FANCR (RAD51), FANCS (BRCA1), FANCT (UBE2T), FANCU (XRCC2), FANCV (REV7), FANCW (RFWD3)</i></p>                                                                                                                                                                                                                                                                                                                                                                                                                                                                                                                                                                                                |



**Supplementary Table 7. Gene-set level rare, deleterious variant (RDV) burden in the study cohorts without BRCA1/2 RDVs**

|                                | TCGA-dbGaP Cohort               |                     | BioMe Cohort                |                     |
|--------------------------------|---------------------------------|---------------------|-----------------------------|---------------------|
|                                | Cases<br>(6,371)                | Controls<br>(6,647) | Cases<br>(1,571)            | Controls<br>(6,200) |
|                                | <b>92 CPD genes</b>             |                     |                             |                     |
| # Variants                     | 226                             | 168                 | 67                          | 162                 |
| # Genes                        | 55                              | 46                  | 33                          | 49                  |
| # Unique individuals           | 392 (6.15%)                     | 300 (4.51%)         | 101 (6.43%)                 | 384 (6.19%)         |
| OR ( <i>p</i> -value) [95% CI] | 1.37 (7.61e-05) [1.17-1.60]     |                     | 1.05 (0.68) [0.83-1.31]     |                     |
|                                | <b>93 DDR genes</b>             |                     |                             |                     |
| # Variants                     | 206                             | 163                 | 61                          | 130                 |
| # Genes                        | 39                              | 34                  | 27                          | 33                  |
| # Unique individuals           | 300 (4.71%)                     | 243 (3.66%)         | 71 (4.52%)                  | 217 (3.50%)         |
| OR ( <i>p</i> -value) [95% CI] | 1.33 (1.54e-03) [1.11-1.58]     |                     | 1.32 (0.05) [1.00-1.72]     |                     |
|                                | <b>297 Somatic Driver genes</b> |                     |                             |                     |
| # Variants                     | 183                             | 136                 | 67                          | 139                 |
| # Genes                        | 57                              | 50                  | 38                          | 57                  |
| # Unique individuals           | 307 (4.82%)                     | 247 (3.72%)         | 85 (5.41%)                  | 236 (3.81%)         |
| OR ( <i>p</i> -value) [95% CI] | 1.30 (3.3e-03) [1.09-1.54]      |                     | 1.45 (4.94e-03) [1.12-1.87] |                     |
|                                | <b>20 Fanconi Anemia genes</b>  |                     |                             |                     |
| # Variants                     | 67                              | 40                  | 11                          | 39                  |
| # Genes                        | 13                              | 11                  | 6                           | 11                  |
| # Unique individuals           | 88 (1.38%)                      | 59 (0.89%)          | 12 (0.76%)                  | 46 (0.74%)          |
| OR ( <i>p</i> -value) [95% CI] | 1.60 (5.41e-03) [1.15-2.25]     |                     | 1.11 (0.75) [0.57-2.01]     |                     |

**Supplementary Table 8: Distribution of males and females in the study cohorts**

**a). Discovery cohort**

| <b>Sl.No</b> | <b>Cancer Type</b>                              | <b>Sample</b> | <b>Male</b>      | <b>Female</b>    | <b>Missing</b> |
|--------------|-------------------------------------------------|---------------|------------------|------------------|----------------|
| 1            | Breast invasive carcinoma                       | 622           | 6<br>(0.96%)     | 616<br>(99.04%)  | 0              |
| 2            | Lung adenocarcinoma                             | 463           | 196<br>(42.33%)  | 231<br>(49.89%)  | 36<br>(7.78%)  |
| 3            | Lung squamous cell carcinoma                    | 443           | 333<br>(75.17%)  | 110<br>(24.83%)  | 0              |
| 4            | Brain Lower Grade Glioma                        | 426           | 237<br>(55.63%)  | 188<br>(44.13%)  | 1<br>(0.23%)   |
| 5            | Head and Neck squamous cell carcinoma           | 426           | 305<br>(71.60%)  | 121<br>(28.40%)  | 0              |
| 6            | Skin Cutaneous Melanoma                         | 424           | 258<br>(60.85%)  | 166<br>(39.15%)  | 0              |
| 7            | Prostate adenocarcinoma                         | 403           | 403<br>(100%)    | 0                | 0              |
| 8            | Thyroid carcinoma                               | 338           | 92<br>(27.22%)   | 246<br>(72.78%)  | 0              |
| 9            | Uterine Corpus Endometrial Carcinoma            | 331           | 0                | 328<br>(99.09%)  | 3<br>(0.91%)   |
| 10           | Bladder Urothelial Carcinoma                    | 305           | 228<br>(74.75%)  | 77<br>(25.25%)   | 0              |
| 11           | Kidney renal clear cell carcinoma               | 279           | 183<br>(65.59%)  | 96<br>(34.41%)   | 0              |
| 12           | Stomach adenocarcinoma                          | 268           | 159<br>(59.33%)  | 109<br>(40.67%)  | 0              |
| 13           | Colon adenocarcinoma                            | 267           | 144<br>(53.93%)  | 123<br>(46.07%)  | 0              |
| 14           | Glioblastoma multiforme                         | 252           | 159<br>(63.10%)  | 92<br>(36.51%)   | 1<br>(0.40%)   |
| 15           | Ovarian serous cystadenocarcinoma               | 235           | 0                | 235<br>(100%)    | 0              |
| 16           | Kidney renal papillary cell carcinoma           | 193           | 146<br>(75.65%)  | 47<br>(24.35%)   | 0              |
| 17           | Liver hepatocellular carcinoma                  | 167           | 92<br>(55.09%)   | 75<br>(44.91%)   | 0              |
| 18           | Cervical SqCC and endocervical adenocarcinoma   | 162           | 0                | 162<br>(100%)    | 0              |
| 19           | Rectum adenocarcinoma                           | 99            | 52<br>(52.53%)   | 46<br>(46.46%)   | 1<br>(1.01%)   |
| 20           | Adrenocortical carcinoma                        | 76            | 28<br>(36.84%)   | 48<br>(63.16%)   | 0              |
| 21           | Acute Myeloid Leukemia                          | 67            | 34<br>(50.75%)   | 33<br>(49.25%)   | 0              |
| 22           | Kidney Chromophobe                              | 56            | 33<br>(58.93%)   | 23<br>(41.07%)   | 0              |
| 23           | Uterine Carcinosarcoma                          | 42            | 0                | 42<br>(100%)     | 0              |
| 24           | Lymphoid Neoplasm Diffuse Large B-cell Lymphoma | 27            | 11<br>(40.74%)   | 16<br>(59.26%)   | 0              |
|              | <b>Total cases</b>                              | 6371          | 3099<br>(48.64%) | 3230<br>(50.70%) | 42<br>(0.66%)  |

|  |                       |      |                  |                  |              |
|--|-----------------------|------|------------------|------------------|--------------|
|  | <b>Total controls</b> | 6647 | 4034<br>(60.69%) | 2610<br>(39.27%) | 3<br>(0.05%) |
|--|-----------------------|------|------------------|------------------|--------------|

**b). Validation cohort**

|                  | Male          | Female        |
|------------------|---------------|---------------|
| Cases (1,571)    | 690 (43.92%)  | 881 (56.08%)  |
| Controls (6,200) | 3150 (50.81%) | 3050 (49.19%) |

**Supplementary Table 9. Gene-set level rare, deleterious variant (RDV) burden in the study cohorts based on the number of genes with RDVs**

|                                                                              | TCGA-dbGaP Cohort            |                     | BioMe Cohort                |                     |
|------------------------------------------------------------------------------|------------------------------|---------------------|-----------------------------|---------------------|
|                                                                              | Cases<br>(6,371)             | Controls<br>(6,647) | Cases<br>(1,571)            | Controls<br>(6,200) |
| <b>94 Cancer predisposition genes</b>                                        |                              |                     |                             |                     |
| # Individ. without RDVs                                                      | 5907                         | 6321                | 1435                        | 5761                |
| # Individ. with RDVs in 1 gene                                               | 452                          | 323                 | 128                         | 426                 |
| # Individ. with RDVs in $\geq 2$ genes                                       | 12                           | 3                   | 8                           | 13                  |
| Comparing Individ with RDV in 1vs0<br>OR ( <i>p</i> -value) [95% CI]         | 1.48 (1.68e-07) [1.28-1.72]  |                     | 1.20 (0.08) [0.98-1.47]     |                     |
| Comparing Individ with RDV in $\geq 2$ vs0<br>OR ( <i>p</i> -value) [95% CI] | 3.31 (0.03) [1.10-13.02]     |                     | 2.55 (0.04) [1.03-5.94]     |                     |
| <b>95 DNA damage repair genes</b>                                            |                              |                     |                             |                     |
| # Individ. without RDVs                                                      | 5997                         | 6378                | 1463                        | 5927                |
| # Individ. with RDVs in 1 gene                                               | 367                          | 269                 | 103                         | 268                 |
| # Individ. with RDVs in $\geq 2$ genes                                       | 7                            | 0                   | 5                           | 5                   |
| Comparing Individ with RDV in 1vs0<br>OR ( <i>p</i> -value) [95% CI]         | 1.47 (2.80e-06) [1.25-1.74]  |                     | 1.55 (3.75e-04) [1.22-1.95] |                     |
| Comparing Individ with RDV in $\geq 2$ vs0<br>OR ( <i>p</i> -value) [95% CI] | 15.13 (0.007) [1.82-1968.26] |                     | 3.96 (0.03) [1.17-13.41]    |                     |
| <b>299 Somatic cancer driver genes</b>                                       |                              |                     |                             |                     |
| # Individ. without RDVs                                                      | 5994                         | 6375                | 1446                        | 5906                |
| # Individ. with RDVs in 1 gene                                               | 366                          | 267                 | 123                         | 288                 |
| # Individ. with RDVs in $\geq 2$ genes                                       | 11                           | 5                   | 2                           | 6                   |
| Comparing Individ with RDV in 1vs0<br>OR ( <i>p</i> -value) [95% CI]         | 1.44 (9.56e-06) [1.23-1.70]  |                     | 1.73 (2.01e-06) [1.39-2.15] |                     |
| Comparing Individ with RDV in $\geq 2$ vs0<br>OR ( <i>p</i> -value) [95% CI] | 2.19 (0.12) [0.82-6.63]      |                     | 1.56 (0.56) [0.29-6.12]     |                     |
| <b>22 Fanconi Anemia genes</b>                                               |                              |                     |                             |                     |
| # Individ. without RDVs                                                      | 6208                         | 6562                | 1519                        | 6097                |
| # Individ. with RDVs in 1 gene                                               | 163                          | 85                  | 51                          | 101                 |
| # Individ. with RDVs in $\geq 2$ genes                                       | 0                            | 0                   | 1                           | 2                   |
| Comparing Individ with RDV in 1vs0<br>OR ( <i>p</i> -value) [95% CI]         | 2.05 (6.14e-08) [1.58-2.70]  |                     | 2.01 (1.24e-04) [1.42-2.80] |                     |
| Comparing Individ with RDV in $\geq 2$ vs0<br>OR ( <i>p</i> -value) [95% CI] | -                            |                     | 2.38 (0.42) [0.22-17.93]    |                     |

**Supplementary Table 10. Effect of M1 Macrophages on survival in TCGA cases**

|    | Cancer Type                                   | Number<br>Indiv | Cox_Coeff    | Cox_p        |
|----|-----------------------------------------------|-----------------|--------------|--------------|
| 1  | Breast invasive carcinoma                     | 606             | -8.00        | 0.301        |
| 2  | Lung adenocarcinoma                           | 415             | 5.23         | 0.352        |
| 3  | Lung squamous cell carcinoma                  | 439             | -1.98        | 0.699        |
| 4  | <b>Brain lower grade glioma</b>               | <b>426</b>      | <b>43.17</b> | <b>0.018</b> |
| 5  | Head and neck squamous cell carcinoma         | 419             | 4.29         | 0.196        |
| 6  | Skin cutaneous melanoma                       | 422             | -9.60        | 0.065        |
| 7  | Prostate adenocarcinoma                       | 401             | -12.18       | 0.872        |
| 8  | Thyroid carcinoma                             | 337             | -16.35       | 0.725        |
| 9  | Uterine Corpus Endometrial Carcinoma          | 324             | 0.86         | 0.968        |
| 10 | Bladder Urothelial Carcinoma                  | 299             | -1.46        | 0.794        |
| 11 | <b>Kidney renal clear cell carcinoma</b>      | <b>273</b>      | <b>15.78</b> | <b>0.034</b> |
| 12 | Stomach adenocarcinoma                        | 246             | 4.50         | 0.641        |
| 13 | Colon adenocarcinoma                          | 255             | -17.47       | 0.270        |
| 14 | Glioblastoma multiforme                       | 99              | 7.52         | 0.578        |
| 15 | Ovarian serous cystadenocarcinoma             | 181             | 4.43         | 0.783        |
| 16 | <b>Kidney renal papillary cell carcinoma</b>  | <b>192</b>      | <b>56.41</b> | <b>0.017</b> |
| 17 | Liver hepatocellular carcinoma                | 164             | -1.62        | 0.912        |
| 18 | Cervical SqCC and endocervical adenocarcinoma | 162             | -12.85       | 0.240        |
| 19 | Rectum adenocarcinoma                         | 94              | -163.52      | 0.321        |
| 20 | Adrenocortical carcinoma                      | 65              | 50.67        | 0.116        |
| 21 | Kidney chromophobe                            | 56              | 51.72        | 0.573        |
| 22 | Uterine carcinosarcoma                        | 42              | 22.86        | 0.346        |
